# Supplementary material for: Gammaherpesvirus Infections in Cattle in Europe
Source: Viruses. 2021 Nov 23;13(12):2337. doi: 10.3390/v13122337 (PMC8709109; doi:10.3390/v13122337)
Supplement: Supplementary file 1 [file viruses-13-02337-s001.zip › viruses-1377411-supplementary.pdf]

## Article

# Gammaherpesvirus infections in cattle in Europe

**Table S1.** BoHV-6 infection in female and male animals and in the different age groups. The sex was not known for 5 of the 448 examined animals. The frequency of the probabilities for BoHV-6 infection in the different age and sex groups is based on the Chi2 test. Differences (“Expected – Observed”) higher than 0.05 and lower than -0.05 between expected and observed (in bold) represent an unexpected result, not following the distribution.

| BoHV-6 Infection in Male and Female Animals         |          |      |          |      |          |      |          |      |
|-----------------------------------------------------|----------|------|----------|------|----------|------|----------|------|
| Sex                                                 | Neg      |      | Pos      |      | All      |      |          |      |
| Male                                                | 107      |      | 33       |      | 140      |      |          |      |
| Female                                              | 194      |      | 109      |      | 303      |      |          |      |
| Total                                               | 306      |      | 142      |      | 443      |      |          |      |
| Frequency of The Probabilities for BoHV-6 Infection |          |      |          |      |          |      |          |      |
| Age Group<br>(y)                                    | Male     |      |          |      | Female   |      |          |      |
|                                                     | Expected |      | Observed |      | Expected |      | Observed |      |
|                                                     | Neg      | Pos  | Neg      | Pos  | Neg      | Pos  | Neg      | Pos  |
| 0 <1                                                | 0.11     | 0.01 | 0.61     | 0.06 | 0.24     | 0.02 | 0.22     | 0.02 |
| 1 <2                                                | 0.05     | 0.02 | 0.12     | 0.13 | 0.10     | 0.05 | 0.16     | 0.05 |
| 2 <3                                                | 0.02     | 0.01 | 0.01     | 0.03 | 0.05     | 0.02 | 0.10     | 0.03 |
| 3 <4                                                | 0.01     | 0.01 | 0.00     | 0.01 | 0.03     | 0.03 | 0.06     | 0.07 |
| 4 <5                                                | 0.01     | 0.01 | 0.01     | 0.01 | 0.02     | 0.03 | 0.04     | 0.05 |
| 5 <6                                                | 0.00     | 0.01 | 0.00     | 0.00 | 0.01     | 0.02 | 0.02     | 0.04 |
| ≥6                                                  | 0.01     | 0.02 | 0.01     | 0.00 | 0.02     | 0.05 | 0.05     | 0.11 |

neg – PCR for BoHV-6 negative in all tested organs; pos – PCR for BoHV-6 positive in at least one tested organ; y – years.

**Table S2.** Frequency of BoHV-6 infection in animals grouped according to the main affected organ system or the disease entity, based on recorded pathological diagnoses.

| Grouping According to the Primarily Affected Organ Systems |     |     |     |
|------------------------------------------------------------|-----|-----|-----|
| Affected Organ System                                      | Neg | Pos | All |
| No abnormality detected                                    | 6   | 0   | 6   |
| No information available                                   | 16  | 2   | 18  |
| Systemic disease and/or multiple organs affected           | 36  | 9   | 45  |
| Musculoskeletal                                            | 18  | 9   | 27  |
| Liver                                                      | 9   | 7   | 16  |
| Gastrointestinal                                           | 85  | 23  | 108 |
| Cardiovascular                                             | 11  | 4   | 15  |
| Body cavities                                              | 8   | 9   | 17  |
| Respiratory                                                | 39  | 21  | 60  |
| Reproductive                                               | 9   | 9   | 18  |
| Others                                                     | 8   | 10  | 18  |
| Slaughtered animals                                        | 61  | 39  | 100 |
| Total                                                      | 306 | 142 | 448 |
| Grouping According to Disease Entity or Aetiology          |     |     |     |
| Disease Entity/Etiology                                    | Neg | Pos | All |
| Slaughtered animals                                        | 67  | 39  | 106 |

|                    |     |     |     |
|--------------------|-----|-----|-----|
| Unknown            | 43  | 13  | 56  |
| Trauma             | 23  | 11  | 34  |
| Congenital         | 5   | 2   | 7   |
| Metabolic          | 6   | 6   | 12  |
| Degenerative       | 2   | 2   | 4   |
| Toxic              | 2   |     | 2   |
| Bacterial          | 105 | 48  | 153 |
| Parasitic          | 11  | 5   | 16  |
| Viral              | 10  | 2   | 12  |
| Neoplastic         | 2   | 2   | 4   |
| Organ misalignment | 15  | 7   | 22  |
| Multifactorial     | 15  | 5   | 20  |
| Total              | 306 | 142 | 448 |

Others: Due to the low number of cases, animals which showed primary affection of the haemolymphatic, neurological or urinary system or the integument were assembled under this heading. Abbreviations: y – years; neg – PCR for BoHV-6 negative in all tested organs; pos – PCR for BoHV-6 positive in at least one tested organ.

**Table S3.** Comparison of OvHV-2 loads in lung, spleen, bronchial ln and tongue of cattle with MCF with BoHV-6 loads in the same organs in cattle without MCF.

| Viral Loads             | Lung         |                  | Spleen       |                  | BLN          |                  | Tongue       |                  |
|-------------------------|--------------|------------------|--------------|------------------|--------------|------------------|--------------|------------------|
|                         | MCF (OvHV-2) | Non-MCF (BoHV-6) |
| Median (copies/100 ng)  | 10,063.46    | 15.35            | 13,749.81    | 72.67            | 4,430.70     | 193.08           | 17,320.12    | 21.58            |
| Average (copies/100 ng) | 25,135.96    | 195.66           | 16,294.11    | 1,232.27         | 10,530.52    | 1,873.49         | 19,235.23    | 431.10           |
| Max (copies/100 ng)     | 77,350.72    | 4,558.00         | 36,829.21    | 46,222.00        | 32,312.40    | 47,609.00        | 37,262.72    | 20,441.00        |
| Min (copies/100 ng)     | 3,066.22     | 0.13             | 847.59       | 0.14             | 948.26       | 0.45             | 5,037.91     | 0.41             |
| No tested positive      | 4            | 115              | 4            | 134              | 4            | 122              | 4            | 102              |

Abbreviations: copies/100 ng – BoHV-6 or OvHV-2 copy numbers/100 ng DNA; No tested positive – number of animals in which the organ tested positive for BoHV-6/OvHV-2 DNA by PCR.
